# Supplementary material
Source: publisher figshare collection journal article supplement (https://gsajournals.figshare.com/ndownloader/files/17284193)
Supplement: Supplementary file 1 [file 17284193]

## Sheet: Table S7 GO analysis of autosom
Supplemental Material, Table S7. GO analysis of autosomal upregulated genes in Smchd1-null mouse NPCs
Category	Term	Count	%	PValue	Genes	List Total	Pop Hits	Pop Total	Fold Enrichment	Bonferroni	Benjamini	FDR
GOTERM_BP_DIRECT	GO:0048706~embryonic skeletal system development	9	4.41176	7.53751e-09	ENSMUSG00000021835, ENSMUSG00000043342, ENSMUSG00000049691, ENSMUSG00000022485, ENSMUSG00000023391, ENSMUSG00000024713, ENSMUSG00000034161, ENSMUSG00000038227, ENSMUSG00000020875	173	44	18082	21.3791	9.08266e-06	9.08266e-06	1.2192e-05
GOTERM_BP_DIRECT	GO:0009952~anterior/posterior pattern specification	12	5.88235	9.57361e-09	ENSMUSG00000038692, ENSMUSG00000021381, ENSMUSG00000043342, ENSMUSG00000048763, ENSMUSG00000079277, ENSMUSG00000022485, ENSMUSG00000024713, ENSMUSG00000038227, ENSMUSG00000075588, ENSMUSG00000020875, ENSMUSG00000000938, ENSMUSG00000075394	173	112	18082	11.1986	1.15361e-05	5.76808e-06	1.54854e-05
GOTERM_BP_DIRECT	GO:0007275~multicellular organism development	31	15.1961	3.67222e-08	ENSMUSG00000038692, ENSMUSG00000003227, ENSMUSG00000024247, ENSMUSG00000046714, ENSMUSG00000037034, ENSMUSG00000075588, ENSMUSG00000075394, ENSMUSG00000038793, ENSMUSG00000028780, ENSMUSG00000043342, ENSMUSG00000034384, ENSMUSG00000023391, ENSMUSG00000024905, ENSMUSG00000034161, ENSMUSG00000081683, ENSMUSG00000021217, ENSMUSG00000021095, ENSMUSG00000031965, ENSMUSG00000048763, ENSMUSG00000028354,…	173	1029	18082	3.14881	4.42492e-05	1.475e-05	5.93983e-05
GOTERM_BP_DIRECT	GO:0048704~embryonic skeletal system morphogenesis	8	3.92157	8.61508e-07	ENSMUSG00000038692, ENSMUSG00000021835, ENSMUSG00000043342, ENSMUSG00000048763, ENSMUSG00000079277, ENSMUSG00000046714, ENSMUSG00000075588, ENSMUSG00000021095	173	55	18082	15.2029	0.00103758	0.000259496	0.00139348
GOTERM_BP_DIRECT	GO:0003215~cardiac right ventricle morphogenesis	5	2.45098	5.28675e-06	ENSMUSG00000021835, ENSMUSG00000028780, ENSMUSG00000031965, ENSMUSG00000015619, ENSMUSG00000021944	173	13	18082	40.2001	0.0063503	0.0012733	0.008551
GOTERM_BP_DIRECT	GO:0007156~homophilic cell adhesion via plasma membrane adhesion molecules	10	4.90196	2.63935e-05	ENSMUSG00000102312, ENSMUSG00000103442, ENSMUSG00000103707, ENSMUSG00000104318, ENSMUSG00000104148, ENSMUSG00000032452, ENSMUSG00000103800, ENSMUSG00000103092, ENSMUSG00000104252, ENSMUSG00000007440	173	163	18082	6.41228	0.0313041	0.00528673	0.042683
GOTERM_BP_DIRECT	GO:0042474~middle ear morphogenesis	5	2.45098	7.24e-05	ENSMUSG00000049691, ENSMUSG00000048387, ENSMUSG00000010461, ENSMUSG00000001751, ENSMUSG00000021095	173	24	18082	21.775	0.0835476	0.0123863	0.117043
GOTERM_BP_DIRECT	GO:0001501~skeletal system development	8	3.92157	7.31491e-05	ENSMUSG00000021835, ENSMUSG00000049691, ENSMUSG00000025232, ENSMUSG00000024247, ENSMUSG00000046714, ENSMUSG00000037034, ENSMUSG00000000938, ENSMUSG00000075394	173	107	18082	7.8146	0.0843745	0.010958	0.118253
GOTERM_BP_DIRECT	GO:0045786~negative regulation of cell cycle	5	2.45098	0.000367201	ENSMUSG00000021835, ENSMUSG00000028351, ENSMUSG00000023809, ENSMUSG00000035131, ENSMUSG00000015619	173	36	18082	14.5167	0.357609	0.0479837	0.592297
GOTERM_BP_DIRECT	GO:0001656~metanephros development	5	2.45098	0.000453391	ENSMUSG00000021835, ENSMUSG00000048387, ENSMUSG00000046714, ENSMUSG00000021217, ENSMUSG00000031558	173	38	18082	13.7527	0.421004	0.0531797	0.730844
GOTERM_BP_DIRECT	GO:0060216~definitive hemopoiesis	4	1.96078	0.000621301	ENSMUSG00000038692, ENSMUSG00000048763, ENSMUSG00000038227, ENSMUSG00000015053	173	18	18082	23.2267	0.527114	0.065816	1.00023
GOTERM_BP_DIRECT	GO:0007399~nervous system development	12	5.88235	0.000990442	ENSMUSG00000028780, ENSMUSG00000004698, ENSMUSG00000027419, ENSMUSG00000034384, ENSMUSG00000000627, ENSMUSG00000015619, ENSMUSG00000027313, ENSMUSG00000064293, ENSMUSG00000056486, ENSMUSG00000063919, ENSMUSG00000031558, ENSMUSG00000061524	173	377	18082	3.3269	0.697016	0.0947156	1.59006
GOTERM_BP_DIRECT	GO:0001657~ureteric bud development	5	2.45098	0.00111011	ENSMUSG00000021835, ENSMUSG00000048387, ENSMUSG00000046714, ENSMUSG00000021217, ENSMUSG00000031558	173	48	18082	10.8875	0.737741	0.0978329	1.78056
GOTERM_BP_DIRECT	GO:0051216~cartilage development	6	2.94118	0.00111041	ENSMUSG00000021835, ENSMUSG00000048763, ENSMUSG00000079277, ENSMUSG00000023391, ENSMUSG00000034161, ENSMUSG00000075394	173	82	18082	7.64782	0.737837	0.0911979	1.78104
GOTERM_BP_DIRECT	GO:0003180~aortic valve morphogenesis	3	1.47059	0.0018308	ENSMUSG00000021835, ENSMUSG00000031965, ENSMUSG00000015619	173	7	18082	44.7944	0.890095	0.136886	2.92054
GOTERM_BP_DIRECT	GO:0009954~proximal/distal pattern formation	4	1.96078	0.00187214	ENSMUSG00000043342, ENSMUSG00000023391, ENSMUSG00000038227, ENSMUSG00000000938	173	26	18082	16.08	0.895445	0.131621	2.98556
GOTERM_BP_DIRECT	GO:0045666~positive regulation of neuron differentiation	6	2.94118	0.00303715	ENSMUSG00000021835, ENSMUSG00000028351, ENSMUSG00000079277, ENSMUSG00000061353, ENSMUSG00000035131, ENSMUSG00000015053	173	103	18082	6.08856	0.974404	0.193949	4.80101
GOTERM_BP_DIRECT	GO:0007507~heart development	9	4.41176	0.00357222	ENSMUSG00000021835, ENSMUSG00000028780, ENSMUSG00000004698, ENSMUSG00000023809, ENSMUSG00000048387, ENSMUSG00000046714, ENSMUSG00000024713, ENSMUSG00000021944, ENSMUSG00000015053	173	261	18082	3.60415	0.986596	0.213033	5.62408
GOTERM_BP_DIRECT	GO:0071773~cellular response to BMP stimulus	4	1.96078	0.00442691	ENSMUSG00000021835, ENSMUSG00000034161, ENSMUSG00000047497, ENSMUSG00000015619	173	35	18082	11.9452	0.995234	0.24526	6.92499
GOTERM_BP_DIRECT	GO:0001823~mesonephros development	3	1.47059	0.00557677	ENSMUSG00000021835, ENSMUSG00000048387, ENSMUSG00000015619	173	12	18082	26.1301	0.998816	0.286049	8.64864
GOTERM_BP_DIRECT	GO:0048701~embryonic cranial skeleton morphogenesis	4	1.96078	0.00601241	ENSMUSG00000021835, ENSMUSG00000046714, ENSMUSG00000023391, ENSMUSG00000028226	173	39	18082	10.72	0.999302	0.292515	9.2938
GOTERM_BP_DIRECT	GO:0006351~transcription, DNA-templated	30	14.7059	0.00628426	ENSMUSG00000038692, ENSMUSG00000021381, ENSMUSG00000033585, ENSMUSG00000046714, ENSMUSG00000003949, ENSMUSG00000037034, ENSMUSG00000075588, ENSMUSG00000015619, ENSMUSG00000075394, ENSMUSG00000015053, ENSMUSG00000043342, ENSMUSG00000049691, ENSMUSG00000048387, ENSMUSG00000034384, ENSMUSG00000034161, ENSMUSG00000021944, ENSMUSG00000021217, ENSMUSG00000031965, ENSMUSG00000048763, ENSMUSG00000010461,…	173	1885	18082	1.66345	0.999498	0.291986	9.69424
GOTERM_BP_DIRECT	GO:0001764~neuron migration	6	2.94118	0.00666414	ENSMUSG00000031965, ENSMUSG00000033585, ENSMUSG00000034384, ENSMUSG00000061353, ENSMUSG00000015619, ENSMUSG00000015053	173	124	18082	5.05743	0.999683	0.295531	10.251
GOTERM_BP_DIRECT	GO:0010595~positive regulation of endothelial cell migration	4	1.96078	0.00691663	ENSMUSG00000021835, ENSMUSG00000020357, ENSMUSG00000046714, ENSMUSG00000015619	173	41	18082	10.1971	0.999767	0.294239	10.6193
GOTERM_BP_DIRECT	GO:0000122~negative regulation of transcription from RNA polymerase II promoter	15	7.35294	0.00995273	ENSMUSG00000038692, ENSMUSG00000031965, ENSMUSG00000048763, ENSMUSG00000046714, ENSMUSG00000015619, ENSMUSG00000015053, ENSMUSG00000038793, ENSMUSG00000034777, ENSMUSG00000021835, ENSMUSG00000004698, ENSMUSG00000043342, ENSMUSG00000049691, ENSMUSG00000048387, ENSMUSG00000023391, ENSMUSG00000021095	173	729	18082	2.15062	0.999994	0.38253	14.9382
GOTERM_BP_DIRECT	GO:0032331~negative regulation of chondrocyte differentiation	3	1.47059	0.0124537	ENSMUSG00000021835, ENSMUSG00000049691, ENSMUSG00000047497	173	18	18082	17.42	1	0.440553	18.3481
GOTERM_BP_DIRECT	GO:0001709~cell fate determination	3	1.47059	0.0124537	ENSMUSG00000034384, ENSMUSG00000015619, ENSMUSG00000015053	173	18	18082	17.42	1	0.440553	18.3481
GOTERM_BP_DIRECT	GO:0001503~ossification	5	2.45098	0.0133389	ENSMUSG00000021835, ENSMUSG00000024247, ENSMUSG00000046714, ENSMUSG00000039883, ENSMUSG00000028226	173	96	18082	5.44376	1	0.450813	19.5239
GOTERM_BP_DIRECT	GO:0060065~uterus development	3	1.47059	0.0138327	ENSMUSG00000038227, ENSMUSG00000015619, ENSMUSG00000000938	173	19	18082	16.5032	1	0.450889	20.1728
GOTERM_BP_DIRECT	GO:0009888~tissue development	3	1.47059	0.0138327	ENSMUSG00000021835, ENSMUSG00000021381, ENSMUSG00000015053	173	19	18082	16.5032	1	0.450889	20.1728
GOTERM_BP_DIRECT	GO:0003279~cardiac septum development	3	1.47059	0.0138327	ENSMUSG00000031965, ENSMUSG00000024713, ENSMUSG00000021944	173	19	18082	16.5032	1	0.450889	20.1728
GOTERM_BP_DIRECT	GO:0045944~positive regulation of transcription from RNA polymerase II promoter	18	8.82353	0.0140381	ENSMUSG00000038692, ENSMUSG00000031965, ENSMUSG00000033585, ENSMUSG00000046714, ENSMUSG00000037034, ENSMUSG00000020875, ENSMUSG00000015619, ENSMUSG00000015053, ENSMUSG00000021835, ENSMUSG00000043342, ENSMUSG00000048387, ENSMUSG00000034384, ENSMUSG00000023391, ENSMUSG00000034161, ENSMUSG00000000938, ENSMUSG00000021944, ENSMUSG00000029361, ENSMUSG00000061524	173	995	18082	1.89082	1	0.444253	20.4414
GOTERM_BP_DIRECT	GO:0003151~outflow tract morphogenesis	4	1.96078	0.0147136	ENSMUSG00000021835, ENSMUSG00000028780, ENSMUSG00000031965, ENSMUSG00000021944	173	54	18082	7.74224	1	0.44865	21.3184
GOTERM_BP_DIRECT	GO:0031290~retinal ganglion cell axon guidance	3	1.47059	0.0152746	ENSMUSG00000000627, ENSMUSG00000031558, ENSMUSG00000061524	173	20	18082	15.678	1	0.450264	22.0399
GOTERM_BP_DIRECT	GO:0001806~type IV hypersensitivity	2	0.980392	0.0189345	ENSMUSG00000029869, ENSMUSG00000015619	173	2	18082	104.52	1	0.513169	26.5968
GOTERM_BP_DIRECT	GO:0035050~embryonic heart tube development	3	1.47059	0.0199646	ENSMUSG00000031965, ENSMUSG00000046714, ENSMUSG00000021944	173	23	18082	13.6331	1	0.521159	27.8336
GOTERM_BP_DIRECT	GO:0050727~regulation of inflammatory response	4	1.96078	0.0203474	ENSMUSG00000030525, ENSMUSG00000047497, ENSMUSG00000033510, ENSMUSG00000025888	173	61	18082	6.85379	1	0.517403	28.2882
GOTERM_BP_DIRECT	GO:0006355~regulation of transcription, DNA-templated	32	15.6863	0.0248423	ENSMUSG00000038692, ENSMUSG00000021381, ENSMUSG00000033585, ENSMUSG00000046714, ENSMUSG00000003949, ENSMUSG00000037034, ENSMUSG00000075588, ENSMUSG00000015619, ENSMUSG00000075394, ENSMUSG00000015053, ENSMUSG00000043342, ENSMUSG00000049691, ENSMUSG00000048387, ENSMUSG00000034384, ENSMUSG00000023391, ENSMUSG00000034161, ENSMUSG00000021944, ENSMUSG00000021217, ENSMUSG00000021095, ENSMUSG00000031965,…	173	2279	18082	1.46759	1	0.579406	33.429
GOTERM_BP_DIRECT	GO:0050919~negative chemotaxis	3	1.47059	0.0251749	ENSMUSG00000028780, ENSMUSG00000000627, ENSMUSG00000031558	173	26	18082	12.06	1	0.574057	33.7953
GOTERM_BP_DIRECT	GO:0001938~positive regulation of endothelial cell proliferation	4	1.96078	0.0259943	ENSMUSG00000021835, ENSMUSG00000020357, ENSMUSG00000037754, ENSMUSG00000061353	173	67	18082	6.24001	1	0.575892	34.6897
GOTERM_BP_DIRECT	GO:0035993~deltoid tuberosity development	2	0.980392	0.0282676	ENSMUSG00000021835, ENSMUSG00000034161	173	3	18082	69.6802	1	0.597192	37.1121
GOTERM_BP_DIRECT	GO:0061035~regulation of cartilage development	2	0.980392	0.0282676	ENSMUSG00000021835, ENSMUSG00000034161	173	3	18082	69.6802	1	0.597192	37.1121
GOTERM_BP_DIRECT	GO:0008045~motor neuron axon guidance	3	1.47059	0.0289212	ENSMUSG00000061353, ENSMUSG00000056486, ENSMUSG00000031558	173	28	18082	11.1986	1	0.596173	37.7929
GOTERM_BP_DIRECT	GO:0090102~cochlea development	3	1.47059	0.0308727	ENSMUSG00000015619, ENSMUSG00000033676, ENSMUSG00000015053	173	29	18082	10.8124	1	0.611203	39.7844
GOTERM_BP_DIRECT	GO:0001958~endochondral ossification	3	1.47059	0.0328748	ENSMUSG00000021835, ENSMUSG00000034161, ENSMUSG00000028226	173	30	18082	10.452	1	0.625602	41.7653
GOTERM_BP_DIRECT	GO:0045746~negative regulation of Notch signaling pathway	3	1.47059	0.0349264	ENSMUSG00000023391, ENSMUSG00000027313, ENSMUSG00000015053	173	31	18082	10.1149	1	0.639396	43.7317
GOTERM_BP_DIRECT	GO:0030154~cell differentiation	14	6.86275	0.0356071	ENSMUSG00000003227, ENSMUSG00000024247, ENSMUSG00000010461, ENSMUSG00000000627, ENSMUSG00000063919, ENSMUSG00000015053, ENSMUSG00000031558, ENSMUSG00000028780, ENSMUSG00000021835, ENSMUSG00000048387, ENSMUSG00000023391, ENSMUSG00000034161, ENSMUSG00000024905, ENSMUSG00000061524	173	780	18082	1.876	1	0.637969	44.3702
GOTERM_BP_DIRECT	GO:0060395~SMAD protein signal transduction	4	1.96078	0.0370776	ENSMUSG00000021835, ENSMUSG00000025232, ENSMUSG00000021944, ENSMUSG00000038793	173	77	18082	5.42962	1	0.644676	45.7264
GOTERM_BP_DIRECT	GO:0010628~positive regulation of gene expression	9	4.41176	0.0373197	ENSMUSG00000021835, ENSMUSG00000090958, ENSMUSG00000003227, ENSMUSG00000023809, ENSMUSG00000048387, ENSMUSG00000079277, ENSMUSG00000034161, ENSMUSG00000015619, ENSMUSG00000021944	173	399	18082	2.3576	1	0.63885	45.9467
GOTERM_BP_DIRECT	GO:0061056~sclerotome development	2	0.980392	0.0375125	ENSMUSG00000034161, ENSMUSG00000037034	173	4	18082	52.2601	1	0.632698	46.1216
GOTERM_BP_DIRECT	GO:0072193~ureter smooth muscle cell differentiation	2	0.980392	0.0375125	ENSMUSG00000021835, ENSMUSG00000021217	173	4	18082	52.2601	1	0.632698	46.1216
GOTERM_BP_DIRECT	GO:0035990~tendon cell differentiation	2	0.980392	0.0375125	ENSMUSG00000021835, ENSMUSG00000034161	173	4	18082	52.2601	1	0.632698	46.1216
GOTERM_BP_DIRECT	GO:0021615~glossopharyngeal nerve morphogenesis	2	0.980392	0.0375125	ENSMUSG00000048763, ENSMUSG00000079277	173	4	18082	52.2601	1	0.632698	46.1216
GOTERM_BP_DIRECT	GO:0002474~antigen processing and presentation of peptide antigen via MHC class I	3	1.47059	0.0458893	ENSMUSG00000016206, ENSMUSG00000067235, ENSMUSG00000060550	173	36	18082	8.71002	1	0.70012	53.2255
GOTERM_BP_DIRECT	GO:0035115~embryonic forelimb morphogenesis	3	1.47059	0.0458893	ENSMUSG00000043342, ENSMUSG00000048387, ENSMUSG00000038227	173	36	18082	8.71002	1	0.70012	53.2255
GOTERM_BP_DIRECT	GO:0030501~positive regulation of bone mineralization	3	1.47059	0.0482154	ENSMUSG00000021835, ENSMUSG00000048387, ENSMUSG00000024247	173	37	18082	8.47461	1	0.710778	55.0363
GOTERM_BP_DIRECT	GO:0016485~protein processing	4	1.96078	0.0488013	ENSMUSG00000027419, ENSMUSG00000024713, ENSMUSG00000025888, ENSMUSG00000028226	173	86	18082	4.86141	1	0.70782	55.4819
GOTERM_BP_DIRECT	GO:0030879~mammary gland development	3	1.47059	0.0505836	ENSMUSG00000043342, ENSMUSG00000038227, ENSMUSG00000020875	173	38	18082	8.2516	1	0.713775	56.8121
GOTERM_BP_DIRECT	GO:0007411~axon guidance	5	2.45098	0.0542119	ENSMUSG00000028780, ENSMUSG00000000627, ENSMUSG00000015619, ENSMUSG00000064293, ENSMUSG00000031558	173	149	18082	3.50739	1	0.73204	59.4058
GOTERM_BP_DIRECT	GO:0001569~patterning of blood vessels	3	1.47059	0.0554422	ENSMUSG00000031965, ENSMUSG00000046714, ENSMUSG00000061353	173	40	18082	7.83902	1	0.733333	60.2515
GOTERM_BP_DIRECT	GO:0001974~blood vessel remodeling	3	1.47059	0.0630212	ENSMUSG00000028780, ENSMUSG00000046714, ENSMUSG00000050541	173	43	18082	7.29211	1	0.772358	65.1079
GOTERM_BP_DIRECT	GO:0060017~parathyroid gland development	2	0.980392	0.0647257	ENSMUSG00000037034, ENSMUSG00000015619	173	7	18082	29.8629	1	0.775349	66.1205
GOTERM_BP_DIRECT	GO:0022029~telencephalon cell migration	2	0.980392	0.0647257	ENSMUSG00000061353, ENSMUSG00000031558	173	7	18082	29.8629	1	0.775349	66.1205
GOTERM_BP_DIRECT	GO:0048539~bone marrow development	2	0.980392	0.0647257	ENSMUSG00000038692, ENSMUSG00000039883	173	7	18082	29.8629	1	0.775349	66.1205
GOTERM_BP_DIRECT	GO:0002062~chondrocyte differentiation	3	1.47059	0.0709271	ENSMUSG00000021835, ENSMUSG00000048387, ENSMUSG00000034161	173	46	18082	6.81654	1	0.800474	69.5769
GOTERM_BP_DIRECT	GO:0048536~spleen development	3	1.47059	0.0709271	ENSMUSG00000038692, ENSMUSG00000021381, ENSMUSG00000049691	173	46	18082	6.81654	1	0.800474	69.5769
GOTERM_BP_DIRECT	GO:2000543~positive regulation of gastrulation	2	0.980392	0.0736257	ENSMUSG00000048387, ENSMUSG00000034161	173	8	18082	26.1301	1	0.807107	70.9751
GOTERM_BP_DIRECT	GO:0090050~positive regulation of cell migration involved in sprouting angiogenesis	2	0.980392	0.0736257	ENSMUSG00000004698, ENSMUSG00000046714	173	8	18082	26.1301	1	0.807107	70.9751
GOTERM_BP_DIRECT	GO:0060008~Sertoli cell differentiation	2	0.980392	0.0736257	ENSMUSG00000034161, ENSMUSG00000021944	173	8	18082	26.1301	1	0.807107	70.9751
GOTERM_BP_DIRECT	GO:0008284~positive regulation of cell proliferation	10	4.90196	0.0746759	ENSMUSG00000021835, ENSMUSG00000020357, ENSMUSG00000030525, ENSMUSG00000070686, ENSMUSG00000034161, ENSMUSG00000061353, ENSMUSG00000022146, ENSMUSG00000038984, ENSMUSG00000029999, ENSMUSG00000032565	173	542	18082	1.92842	1	0.806161	71.5028
GOTERM_BP_DIRECT	GO:0010468~regulation of gene expression	7	3.43137	0.0747638	ENSMUSG00000021835, ENSMUSG00000035459, ENSMUSG00000043342, ENSMUSG00000038227, ENSMUSG00000000938, ENSMUSG00000021944, ENSMUSG00000021217	173	308	18082	2.37546	1	0.800993	71.5466
GOTERM_BP_DIRECT	GO:0009725~response to hormone	3	1.47059	0.0763673	ENSMUSG00000046714, ENSMUSG00000015653, ENSMUSG00000050541	173	48	18082	6.53251	1	0.802591	72.3338
GOTERM_BP_DIRECT	GO:0048286~lung alveolus development	3	1.47059	0.0763673	ENSMUSG00000021835, ENSMUSG00000020357, ENSMUSG00000024247	173	48	18082	6.53251	1	0.802591	72.3338
GOTERM_BP_DIRECT	GO:0007409~axonogenesis	4	1.96078	0.082174	ENSMUSG00000034777, ENSMUSG00000048304, ENSMUSG00000033585, ENSMUSG00000031558	173	107	18082	3.9073	1	0.821309	75.0169
GOTERM_BP_DIRECT	GO:0006357~regulation of transcription from RNA polymerase II promoter	8	3.92157	0.0854328	ENSMUSG00000034777, ENSMUSG00000021381, ENSMUSG00000034384, ENSMUSG00000023391, ENSMUSG00000015619, ENSMUSG00000021944, ENSMUSG00000070632, ENSMUSG00000021217	173	397	18082	2.1062	1	0.828664	76.4136
GOTERM_BP_DIRECT	GO:0060119~inner ear receptor cell development	2	0.980392	0.0911738	ENSMUSG00000033676, ENSMUSG00000001751	173	10	18082	20.904	1	0.844025	78.6978
GOTERM_BP_DIRECT	GO:0045843~negative regulation of striated muscle tissue development	2	0.980392	0.0911738	ENSMUSG00000021835, ENSMUSG00000004698	173	10	18082	20.904	1	0.844025	78.6978
GOTERM_BP_DIRECT	GO:0055123~digestive system development	2	0.980392	0.0911738	ENSMUSG00000021381, ENSMUSG00000049691	173	10	18082	20.904	1	0.844025	78.6978
GOTERM_BP_DIRECT	GO:0008584~male gonad development	4	1.96078	0.0912592	ENSMUSG00000038227, ENSMUSG00000015619, ENSMUSG00000000938, ENSMUSG00000021944	173	112	18082	3.73287	1	0.839645	78.7301
GOTERM_BP_DIRECT	GO:0048705~skeletal system morphogenesis	3	1.47059	0.0934262	ENSMUSG00000038692, ENSMUSG00000049691, ENSMUSG00000075588	173	54	18082	5.80668	1	0.842246	79.5358
GOTERM_BP_DIRECT	GO:0009791~post-embryonic development	4	1.96078	0.0950058	ENSMUSG00000021835, ENSMUSG00000028780, ENSMUSG00000033585, ENSMUSG00000015619	173	114	18082	3.66738	1	0.842863	80.105
GOTERM_BP_DIRECT	GO:0035914~skeletal muscle cell differentiation	3	1.47059	0.0963685	ENSMUSG00000003949, ENSMUSG00000034161, ENSMUSG00000021944	173	55	18082	5.7011	1	0.84278	80.5841
GOTERM_BP_DIRECT	GO:0001756~somitogenesis	3	1.47059	0.099337	ENSMUSG00000028780, ENSMUSG00000046714, ENSMUSG00000037034	173	56	18082	5.5993	1	0.847665	81.5904
GOTERM_BP_DIRECT	GO:0016486~peptide hormone processing	2	0.980392	0.0998236	ENSMUSG00000027419, ENSMUSG00000024713	173	11	18082	19.0037	1	0.844883	81.7506
